# Supplementary material for: Hrq1/RECQL4 regulation is critical for preventing aberrant recombination during DNA intrastrand crosslink repair and is upregulated in breast cancer
Source: PLoS Genet. 2022 Sep 20;18(9):e1010122. doi: 10.1371/journal.pgen.1010122 (PMC9488787; doi:10.1371/journal.pgen.1010122)
Supplement: S2 Data — (XLSX) [file pgen.1010122.s008.xlsx]

## Sheet: A. Trial 1
Alpha Factor
	Loading Control	Background	Loading control - background
AS	21856.5	34310	12453.5
0 min	22081.3	33984.9	11903.6
20 min	21889.5	33854.7	11965.3
40 min	22237.4	34130.8	11893.4
60 min	22588.6	33974.4	11385.8
80 min	22991.4	34043.7	11052.4
100 min	23204.3	33954.5	10750.2
120 min	22414	34116.6	11702.7
	Clb2	Background	Clb2 - Backgorund	Clb2/Control
AS	25248.8	34392.2	9143.37	0.734198
0	34687.6	34751.8	64.198	0.00539316
20	34388	34586.2	198.201	0.0165647
40	29275.1	34289.2	5014.15	0.421592
60	23089.8	33517.9	10428.1	0.915888
80	23423.9	32690.6	9266.73	0.83844
100	26835.3	33741.8	6906.6	0.642464
120	28039.2	33687.2	5648.06	0.48263
	Hrq1	Background	Hrq1-Background	Hrq1/Control
AS	30047.9	35832.5	5784.57	0.464492
0	34402.8	35838.3	1435.58	0.120601
20	33156.9	35772.4	2615.48	0.218589	`
40	26707.4	35799	9091.66	0.764431
60	26059.5	35768.7	9709.21	0.852747
80	25875.4	35768.7	9893.3	0.89513
100	26844.1	35578.4	8734.28	0.812478
120	25730.7	35528.5	9797.77	0.837225

## Sheet: B. Trial 2
Alpha Factor
	Loading Control	Background	Loading control - background
AS	25263.2	35287.8	10024.7
0 min	24035.7	35119.9	11084.3
20 min	24480.7	34888.2	10407.5
40 min	23617.7	34727.5	11109.8
60 min	23498.9	34520.2	11021.3
80 min	21960.9	34138.2	12177.3
100 min	21454.3	34314.2	12859.9
120 min	22461.6	34055.5	11593.9
	Clb2	Background	Clb2 - Backgorund	Clb2/Control
AS	30050.5	35761.5	5711.02	0.569697
0	35330.6	35471.1	140.441	0.0126703
20	35122.2	35396	273.818	0.0263097
40	29696.5	35278.4	5581.87	0.502426
60	25658.3	35178.6	9520.25	0.863804
80	29050.1	34969	5918.8	0.486053
100	29120.4	34965.7	5845.29	0.454537
120	26727.8	35033.5	8305.66	0.716382
	Hrq1	Background	Hrq1-Background	Hrq1/Control
AS	31902.5	34932.4	3029.89	0.302244
0	31129.3	35014	3884.64	0.350464
20	33076.2	34842.2	1765.97	0.169682
40	31291.4	34847.3	3555.94	0.320071
60	31376.7	34975.5	3598.85	0.326536
80	31461	34727.6	3266.62	0.268256
100	30870.6	34431.2	3560.63	0.276879
120	30691	34496.5	3805.58	0.32824

## Sheet: C. Trial 3
Alpha Factor
	Loading Control	Background	Loading control - background
AS	103.625	134.704	31.079
0 min	94.183	135.353	41.17
20 min	96.787	135.892	39.105
40 min	92.412	137.006	44.594
60 min	92.349	137.922	45.573
80 min	97.092	138.69	41.598
100 min	98.532	138.095	39.563
120 min	100.83	136.408	35.578
	Clb2	Background	Clb2 - Backgorund	Clb2/Control
AS	120.034	134.6	14.566	0.468677
0	132.743	134.525	1.782	0.0432839
20	130.175	135.304	5.129	0.13116
40	120.676	135.918	15.242	0.341795
60	91.025	136.262	45.237	0.992627
80	92.296	135.478	43.182	1.03808
100	112.651	135.81	23.159	0.58537
120	122.737	136.618	13.881	0.390157
	Hrq1	Background	Hrq1-Background	Hrq1/Control
AS	117.097	128.822	11.725	0.377264
0	121.396	128.095	6.699	0.162716
20	121.985	127.413	5.428	0.138806
40	110.641	129.716	19.075	0.427748
60	102.446	129.735	27.289	0.598798
80	102.375	129.243	26.868	0.645896
100	100.776	129.234	28.458	0.719308
120	112.553	132.057	19.504	0.548204
